# Supplementary material for: Preanalytical considerations in quantifying circulating miRNAs that predict end-stage kidney disease in diabetes
Source: PubMed Central journal article supplement (PMC11383361; doi:10.1172/jci.insight.174153), 2024-06-24
Supplement: jciinsight-9-174153-s009.pdf [file jciinsight-9-174153-s009.pdf]

**SUPPLEMENTARY MATERIAL**

**Supplemental Table S1: Concentration of miRNAs in whole plasma and RNA extracted from plasma measured by different platforms to quantify miRNAs (Excel file).**

**Supplemental Table S2. Spearman correlation between raw read counts obtained using EdgeSeq platform and other platforms to measure 17 ESKD-associated cfmiRNAs in whole plasma and in RNA extracted from plasma in 8 T1D individuals.**

| cfmiRNA     | EdgeSeq whole plasma<br>Vs. EdgeSeq RNA | EdgeSeq whole plasma<br>vs. RNASeq_1 | EdgeSeq whole plasma<br>vs. RNASeq_2 |
|-------------|-----------------------------------------|--------------------------------------|--------------------------------------|
|             | $r_s$                                   | $r_s$                                | $r_s$                                |
| miR-1287-5p | 0.26                                    | -0.39                                | -0.28                                |
| miR-4447    | -0.20                                   | -                                    | -                                    |
| miR-6722-3p | 0.21                                    | -                                    | -                                    |
| miR-6887-5p | -0.55                                   | -                                    | -                                    |
| miR-197-5p  | 0.13                                    | -                                    | -0.49                                |
| miR-5739    | -0.01                                   | -                                    | -                                    |
| miR-658     | 0.05                                    | -                                    | -                                    |
| miR-1207-5p | 0.36                                    | -                                    | -                                    |
| miR-339-5p  | 0.31                                    | 0.17                                 | -0.57                                |
| miR-324-3p  | -0.48                                   | 0.10                                 | 0.17                                 |
| miR-185-5p  | 0.67                                    | 0.53                                 | 0.29                                 |
| miR-22-3p   | 0.84*                                   | 0.14                                 | 0.16                                 |
| miR-378i    | 0.57                                    | -                                    | -0.33                                |
| miR-378d    | 0.26                                    | -0.62                                | 0.45                                 |
| miR-378g    | 0.19                                    | -                                    | -                                    |
| miR-378a-3p | 0.55                                    | 0.50                                 | -0.55                                |
| miR-328-3p  | 0.60                                    | 0.20                                 | 0.05                                 |

$r_s$  - Spearman correlation coefficient

\*  $p < 0.05$

**Supplemental Table S3. Spearman correlation between storage time and raw read counts of 17 whole plasma ESKD associated cfmiRNAs.**

| <b>cfmiRNA</b>     | <b><math>r_s</math></b> | <b><math>P</math></b> |
|--------------------|-------------------------|-----------------------|
| <b>miR-1287-5p</b> | 0.03                    | 7.6E-1                |
| <b>miR-4447</b>    | -0.02                   | 8.1E-1                |
| <b>miR-6722-3p</b> | -0.08                   | 3.3E-1                |
| <b>miR-6887-5p</b> | -0.27                   | 1.2E-3                |
| <b>miR-197-5p</b>  | 0.05                    | 5.5E-1                |
| <b>miR-5739</b>    | -0.04                   | 6.7E-1                |
| <b>miR-658</b>     | 0.24                    | 3.9E-3                |
| <b>miR-1207-5p</b> | 0.29                    | 4.0E-4                |
| <b>miR-339-5p</b>  | -0.03                   | 6.8E-1                |
| <b>miR-324-3p</b>  | -0.07                   | 3.9E-1                |
| <b>miR-185-5p</b>  | -0.11                   | 1.9E-1                |
| <b>miR-22-3p</b>   | 0.01                    | 9.0E-1                |
| <b>miR-378i</b>    | -0.01                   | 8.9E-1                |
| <b>miR-378d</b>    | -0.17                   | 3.8E-2                |
| <b>miR-378g</b>    | 0.02                    | 7.7E-1                |
| <b>miR-378a-3p</b> | 0.02                    | 7.8E-1                |
| <b>miR-328-3p</b>  | -0.03                   | 7.2E-1                |

$r_s$  - Spearman correlation coefficient

The mean  $\pm$  SD of storage duration (year) was  $9.3 \pm 2.3$  years for 145 T2D individuals.

**Supplemental Table S4. Spearman correlation between raw read counts of 17 whole plasma ESKD associated cfmiRNAs and clinical characteristics in 145 T2D.**

| <b>cfmiRNA</b>                   | <b>Age</b><br>$r_s$ | <b>BMI</b><br>$r_s$ | <b>A1c</b><br>$r_s$ | <b>FC</b><br><b>M/F</b> |
|----------------------------------|---------------------|---------------------|---------------------|-------------------------|
| <b><i>Risk cfmiRNA</i></b>       |                     |                     |                     |                         |
| miR-1287-5p                      | 0.07                | 0.12                | 0.09                | 0.49*                   |
| miR-4447                         | 0.00                | 0.00                | 0.15                | 0.46*                   |
| miR-6722-3p                      | -0.04               | -0.01               | 0.23                | 0.19                    |
| miR-6887-5p                      | 0.00                | 0.05                | 0.18                | 0.26                    |
| miR-197-5p                       | 0.07                | 0.20                | 0.02                | 0.23                    |
| miR-5739                         | 0.01                | 0.09                | -0.01               | 0.39*                   |
| miR-658                          | 0.07                | 0.05                | -0.04               | 0.39*                   |
| miR-1207-5p                      | 0.03                | -0.09               | 0.00                | 0.43*                   |
| <b><i>Protective cfmiRNA</i></b> |                     |                     |                     |                         |
| miR-339-5p                       | -0.02               | -0.03               | -0.10               | -0.23                   |
| miR-324-3p                       | 0.07                | 0.02                | -0.04               | -0.29*                  |
| miR-185-5p                       | 0.09                | 0.05                | -0.04               | -0.17                   |
| miR-22-3p                        | 0.07                | -0.03               | -0.21               | -0.24                   |
| miR-378i                         | -0.01               | -0.03               | -0.29               | 0.07                    |
| miR-378d                         | 0.13                | -0.10               | -0.18               | 0.03                    |
| miR-378g                         | 0.07                | -0.02               | -0.29               | 0.02                    |
| miR-378a-3p                      | 0.04                | -0.01               | -0.24               | 0.02                    |
| miR-328-3p                       | -0.03               | -0.03               | 0.01                | -0.20                   |

$r_s$  - Spearman correlation coefficient

**FC M/F** Fold change of Men/Women

\*  $p < 0.05$  without adjustment for multiple comparisons

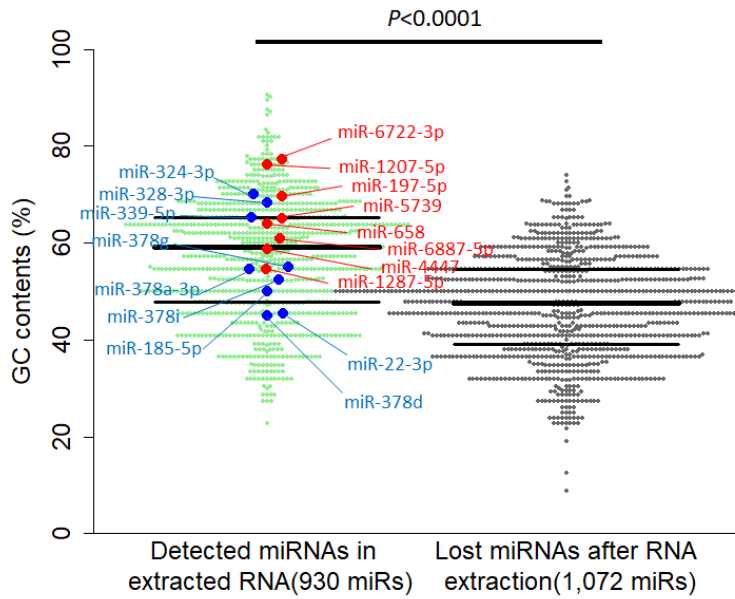

**Supplemental Figure S1.** Comparison of GC contents of miRNAs in extracted RNA and cfmiRNAs lost during RNA extraction. The solid lines represent the median and the thinner lines indicate lower and upper quartiles. In total, 930 cfmiRNAs (46%) were detected in extracted RNA by EdgeSeq, whereas 1,072 cfmiRNAs (54%) were lost during RNA extraction.

**Supplemental Table S5. Previously reported cfmiRNAs associated with clinical characteristics.**

| Individuals/characteristic | cfmiRNA     | method (sample type)                                    | Up/Down | Author(s)         |
|----------------------------|-------------|---------------------------------------------------------|---------|-------------------|
| Healthy/Age                | miR-142-5p  | RNASeq and qPCR<br>(RNA extracted from plasma)          | Down    | Zhang, et al (1)  |
|                            | miR-29b     |                                                         |         |                   |
|                            | miR-106b    |                                                         |         |                   |
|                            | miR-130b    |                                                         |         |                   |
|                            | miR-340     |                                                         |         |                   |
|                            | miR-92a     |                                                         |         |                   |
|                            | miR-222     |                                                         |         |                   |
|                            | miR-375     |                                                         |         |                   |
| Healthy/Age                | miR-20a     | qPCR (RNA extracted from serum)                         | Down    | Sawada et al (2)  |
| Healthy/Age                | let-7a-5p   | qPCR (RNA extracted from plasma)                        | Down    | Ameling et al (3) |
|                            | miR-126-3p  |                                                         |         |                   |
|                            | miR-142-3p  |                                                         |         |                   |
|                            | miR-21-5p   |                                                         |         |                   |
|                            | miR-30b-5p  |                                                         |         |                   |
|                            | miR-30c-5p  |                                                         |         |                   |
|                            | miR-93-5p   |                                                         |         |                   |
| Healthy/age                | miR-1284    | microarray + RNAseq<br>(RNA extracted from whole blood) | Up      | Meder et al(4)    |
|                            | miR-93-3p   |                                                         |         |                   |
|                            | miR-1262    |                                                         |         |                   |
|                            | miR-34a-5p  |                                                         |         |                   |
|                            | miR-145-5p  |                                                         |         |                   |
| Healthy/Sex                | miR-145-5p  | qPCR<br>(RNA extracted from plasma)                     | Down    | Ameling et al (3) |
|                            | miR-22-3p   |                                                         |         |                   |
|                            | miR-142-3p  |                                                         |         |                   |
|                            | miR-424-5p  |                                                         |         |                   |
|                            | miR-148a-3p |                                                         |         |                   |
|                            | miR-150-5p  |                                                         |         |                   |
|                            | miR-30d-5p  |                                                         |         |                   |
| Healthy/BMI                | miR-106a-5p | qPCR<br>(RNA extracted from plasma)                     | Up      | Ameling et al (3) |
|                            | miR-122-5p  |                                                         |         |                   |
|                            | miR-143-3p  |                                                         |         |                   |
|                            | miR-145-5p  |                                                         |         |                   |
|                            | miR-148a-3p |                                                         |         |                   |
|                            | miR-185-5p  |                                                         |         |                   |
|                            | miR-193b-3p |                                                         |         |                   |
|                            | miR-194-5p  |                                                         |         |                   |
|                            | miR-20a-5p  |                                                         |         |                   |
|                            | miR-215     |                                                         |         |                   |
|                            | miR-365a-3p |                                                         |         |                   |
| miR-505-3p                 |             |                                                         |         |                   |

|                                  |             |                                  |      |                    |
|----------------------------------|-------------|----------------------------------|------|--------------------|
|                                  | miR-885-5p  |                                  | Down |                    |
|                                  | miR-93-5p   |                                  | Up   |                    |
|                                  | miR-99a-5p  |                                  | Down |                    |
| Healthy/Obesity                  | miR-17-5p   | qPCR                             | Down | Heneghan et al (5) |
|                                  | miR-132     | (RNA extracted from whole blood) | Down |                    |
| Healthy/Obesity                  | miR-142-3p  | qPCR                             | Up   | Ortega et al (6)   |
|                                  | miR-140-5p  | (RNA extracted from plasma)      | Up   |                    |
|                                  | miR-222     |                                  | Up   |                    |
|                                  | miR-130b    |                                  | Up   |                    |
|                                  | miR-221     |                                  | Up   |                    |
|                                  | miR-15a     |                                  | Up   |                    |
|                                  | miR-520c-3p |                                  | Up   |                    |
|                                  | miR-423-5p  |                                  | Up   |                    |
|                                  | miR-130b    |                                  | Down |                    |
| Healthy/Obesity                  | miR-503     | qPCR                             | Down | Pescador et al (7) |
|                                  | miR-138     | (RNA extracted from serum)       | Down |                    |
|                                  | miR-376a    |                                  | Down |                    |
|                                  | miR-15b     |                                  | Up   |                    |
| Obesity and lean                 | miR-21      | qPCR                             | Down | Ghorbani (8)       |
|                                  |             | (RNA extracted from serum)       |      |                    |
| Healthy/Obesity                  | miR-142-3p  | qPCR                             | Up   | Al-Rawaf et al (9) |
|                                  | miR-140-5p  | (RNA extracted from plasma)      | Up   |                    |
|                                  | miR-222     |                                  | Up   |                    |
|                                  | miR-143     |                                  | Up   |                    |
|                                  | miR-130     |                                  | Up   |                    |
|                                  | miR-532-5p  |                                  | Down |                    |
|                                  | miR-423-5p  |                                  | Down |                    |
|                                  | miR-520c-3p |                                  | Down |                    |
|                                  | miR-146a    |                                  | Down |                    |
|                                  | miR-15a     |                                  | Down |                    |
| Healthy/Obesity                  | miR-222     | miRNA sequence & qPCR            | Up   | Cui et al (10)     |
|                                  | miR-486     | (RNA extracted from serum)       | Up   |                    |
|                                  | miR-146b    |                                  | Up   |                    |
|                                  | miR-146a    |                                  | Up   |                    |
|                                  | miR-20a     |                                  | Up   |                    |
|                                  | miR-15b     |                                  | Up   |                    |
|                                  | miR-26b'    |                                  | Up   |                    |
| Healthy/Obesity<br>Brandt et al. | miR-122     | qPCR                             | Up   | Brandt et al (11)  |
|                                  |             | (RNA extracted from serum)       |      |                    |
| T1D individuals/HbA1c            | miR-125b-5p | edgeSeq & qPCR                   | Up   | Satake et al (12)  |
|                                  | miR-365a-3p |                                  | Up   |                    |
|                                  | miR-7-1-3p  |                                  | Up   |                    |

|             |                                                                   |      |
|-------------|-------------------------------------------------------------------|------|
| miR-193a-5p | (whole plasma for edgeSeq and RNA extracted from plasma for qPCR) | Up   |
| miR-200c-3p |                                                                   | Up   |
| miR-5190    |                                                                   | Down |
| miR-770-5p  |                                                                   | Down |
| miR-6799-3p |                                                                   | Down |
| miR-6793-5p |                                                                   | Down |
| miR-1228-3p |                                                                   | Down |

---

### Supplementary references.

1. Zhang H, et al. Investigation of microRNA expression in human serum during the aging process. *J Gerontol A Biol Aci Med Sci* 2015;70(1):102-109
2. Sawada S, et al. Effect of aging and sex on circulating microRNAs in humans. *Adv Aging Res* 2014;3:152-159
3. Ameling S, et al. Associations of circulating plasma microRNAs with age, body mass index and sex in a population-based study. *BMC Med Genomics* 2015;8:61
4. Meder B, et al. Influence of the confounding factors age and sex on microRNA profiles from peripheral blood. *Clin Chem* 2014;60(9):1200-1208
5. Heneghan HM, et al. Differential miRNA expression in omental adipose tissue and in the circulation of obese patients identifies novel metabolic biomarkers. *J Clin Endocrinol Metab* 2011;96(5):E846-850.
6. Ortega FJ, et al. targeting the circulating microRNA signature of obesity. *Clin Chem* 2013;59(5):781-792
7. Pescador N, et al. Serum circulating microRNA profiling for identification of potential type 2 diabetes and obesity biomarkers. *PLoS One* 2013;8(10):e77251
8. Ghorbani S, et al. Decreased serum microRNA-21 level is associated with obesity in healthy and type 2 diabetic subjects. *Arch Physiol Biochem* 2018;124(4):300-305
9. Al-Rawaf HA. Circulating microRNAs and adipokines as markers of metabolic syndrome in adolescents with obesity. *Clin Nutr* 2019;38(5):2231-2238
10. Cui X, et al. Change in circulating microRNA profile of obese children indicates future risk of adult diabetes. *Metabolism* 2018;78:95-105
11. Brandt S, et al. Circulating levels of miR-122 and nonalcoholic fatty liver disease in pre-pubertal obese children. *Pediatric Obesity* 2018;13(3):175-182
12. Satake E, et al. Circulating miRNA profiles associated with hyperglycemia in patients with type 1 diabetes. *Diabetes* 2018;67(5):1013-1023
